# Supplementary material for: Hepatitis B and C screening needs among different ethnic groups: A population-based study in Amsterdam, the Netherlands
Source: PubMed Central journal article supplement — JHEP Rep. 2019 May 31;1(2):71–80. doi: 10.1016/j.jhepr.2019.04.003 (PMC7001549; doi:10.1016/j.jhepr.2019.04.003), 2019-05-31
Supplement: mmc2.pdf [file mmc2.pdf]

## Journal of Hepatology

### CTAT methods

Tables for a “Complete, Transparent, Accurate and Timely account” (CTAT) are now mandatory for all revised submissions. The aim is to enhance the reproducibility of methods.

- Only include the parts relevant to your study
- Refer to the CTAT in the main text as ‘Supplementary CTAT Table’
- Do not add subheadings
- Add as many rows as needed to include all information
- Only include one item per row

**If the CTAT form is not relevant to your study, please outline the reasons why:**

CTAT form is not relevant to our study as samples were collected among participants in this study and were tested for HBV and HCV markers using routine diagnostics.

#### 1.1 Antibodies

| Name | Citation | Supplier | Cat no. | Clone no. |
|------|----------|----------|---------|-----------|
|      |          |          |         |           |

#### 1.2 Cell lines

| Name | Citation | Supplier | Cat no. | Passage no. | Authentication test method |
|------|----------|----------|---------|-------------|----------------------------|
|      |          |          |         |             |                            |

#### 1.3 Organisms

| Name | Citation | Supplier | Strain | Sex | Age | Overall n number |
|------|----------|----------|--------|-----|-----|------------------|
|      |          |          |        |     |     |                  |

#### 1.4 Sequence based reagents

| Name | Sequence | Supplier |
|------|----------|----------|
|      |          |          |

#### 1.5 Biological samples

| Description | Source | Identifier |
|-------------|--------|------------|
|             |        |            |

#### 1.6 Deposited data

| Name of repository | Identifier | Link |
|--------------------|------------|------|
|                    |            |      |

**1.7 Software**

| Software name | Manufacturer | Version |
|---------------|--------------|---------|
|               |              |         |

**1.8 Other (e.g. drugs, proteins, vectors etc.)**

|  |  |  |
|--|--|--|
|  |  |  |
|  |  |  |

**1.9 Please provide the details of the corresponding methods author for the manuscript:**

|                                         |
|-----------------------------------------|
| Janneke P. Bil<br>jbil@ggd.amsterdam.nl |
|-----------------------------------------|

**2.0 Please confirm for randomised controlled trials all versions of the clinical protocol are included in the submission. These will be published online as supplementary information.**

|      |
|------|
| N.A. |
|------|
